# Supplementary material
Source: Springer Nature journal article supplement (https://www.springermedizin.de/resource/supplementary/12943_2010_833_MOESM13_ESM.pdf/9554940)

### A. FAM65B

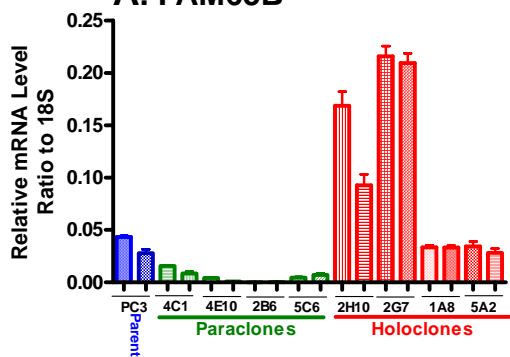

### E. FAM65B

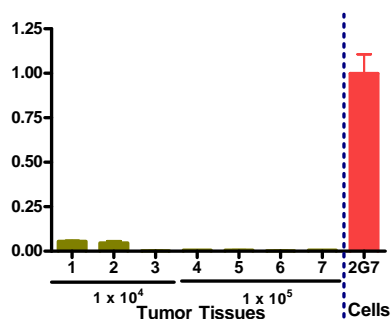

### B. MFI2

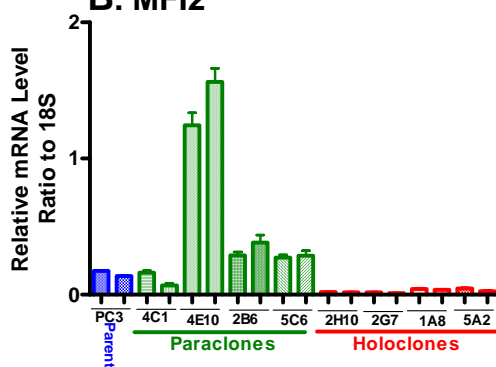

### F. MFI2

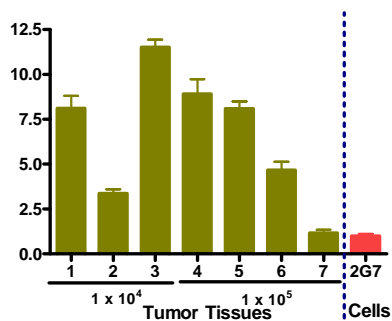

### C. LEF1

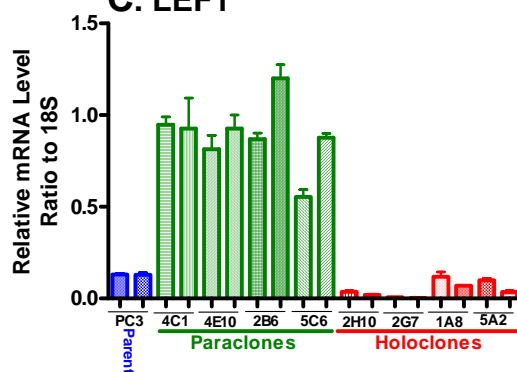

### G. LEF1

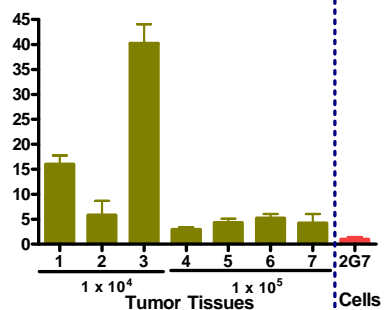

### D. IL18R1

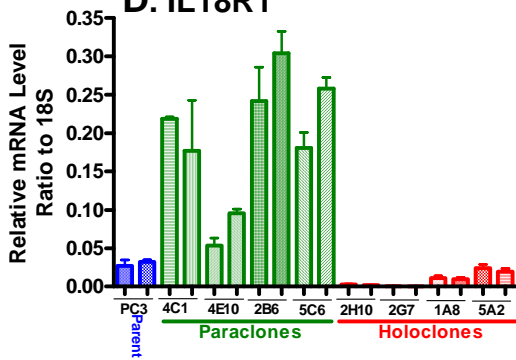

### H. IL18R1

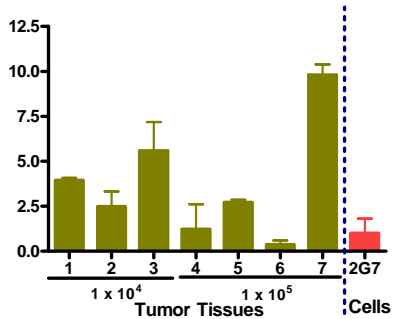

Supplement: MOESM13 [file 9554940]
